# Supplementary material for: Phonon-mediated stabilization and softening of 2D transition metal carbides: case studies of Ti2CO2 and Mo2CO2
Source: Royal Society of Chemistry journal article supplement (doi:10.1039/c8cp00752g), 2018-01-01
Supplement: c8cp00752g1.pdf [file c8cp00752g1.pdf]

**Table S1** The calculated equilibrium lattice parameters ( $a$ ), the layer thicknesses ( $L$ ), the bond lengths between surface M atom and termination ( $d_{M-T}$ ), the differences of adsorption energy between the configuration I and configuration II ( $\Delta E_{\text{adsorption}} = E_{\text{configuration I}} - E_{\text{configuration II}}$ ), and the band gaps ( $\Delta E_{\text{gap}}$ ) of the selected oxygen-functionalized MXenes in comparison with previous theoretical results.

| Material                           |                    | $a$ (Å) | $L$ (Å) | $d_{M-T}$ (Å) | $\Delta E_{\text{adsorption}}$ (eV) | $\Delta E_{\text{gap}}$ (eV) |
|------------------------------------|--------------------|---------|---------|---------------|-------------------------------------|------------------------------|
| I-Ti <sub>2</sub> CO <sub>2</sub>  | Theo. <sup>a</sup> | 3.0349  | 4.47    | 1.98          | 0.88                                | 0.24                         |
|                                    | Theo. <sup>b</sup> | 3.029   | 4.45    | 1.98          | 0.88                                | 0.24                         |
|                                    | Theo. <sup>c</sup> |         |         |               |                                     | 0.25                         |
|                                    | Theo. <sup>d</sup> | 3.04    |         |               |                                     | 0.26                         |
|                                    | PBE                | 3.0330  | 4.46    | 1.98          | 0.88                                | 0.25                         |
| II-Mo <sub>2</sub> CO <sub>2</sub> | Theo. <sup>e</sup> | 2.8836  | 5.21    | 2.07          | -0.55                               | metallic                     |
|                                    | Theo. <sup>f</sup> | 2.891   |         |               | -0.65                               | metallic                     |
|                                    | Theo. <sup>g</sup> |         |         |               | -0.56                               | metallic                     |
|                                    | PBE                | 2.8828  | 5.20    | 2.07          | -0.55                               | metallic                     |

<sup>a</sup> Ref. 1, <sup>b</sup> Ref. 2, <sup>c</sup> Ref. 3, <sup>d</sup> Ref. 4, <sup>e</sup> Ref. 5, <sup>f</sup> Ref. 6, <sup>g</sup> Ref. 7.

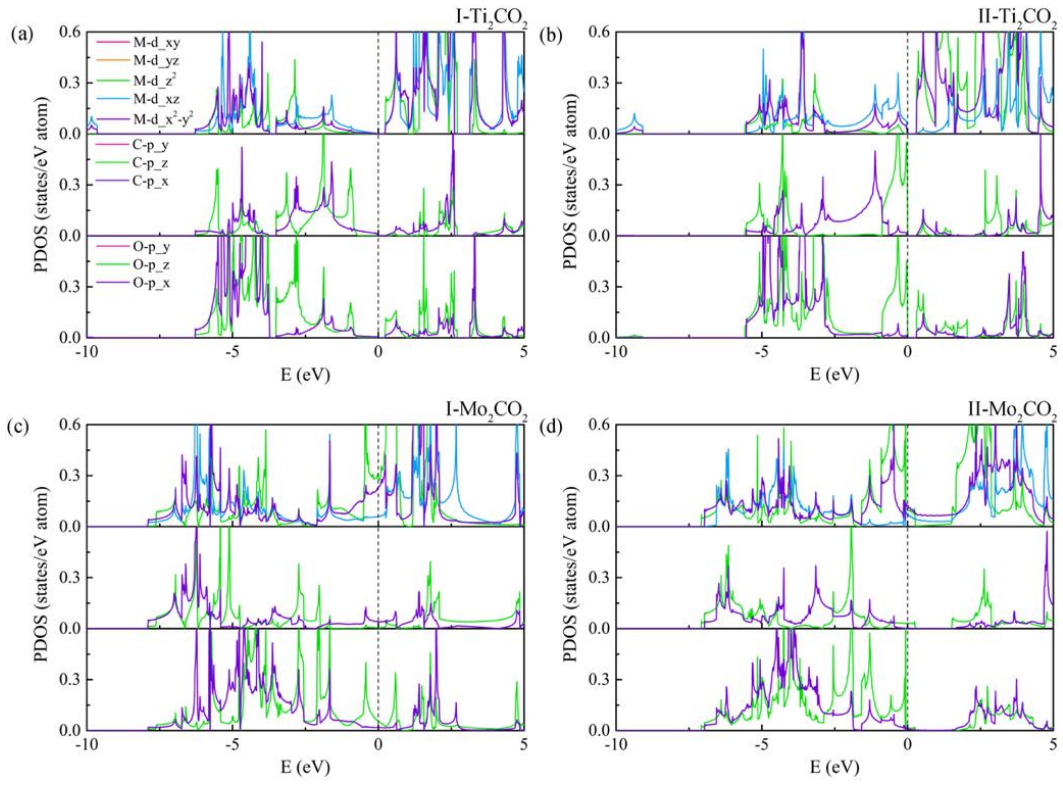

**Fig. S1** The PDOS of (a) I-TiCO<sub>2</sub>, (b) II-TiCO<sub>2</sub>, (c) I-Mo<sub>2</sub>CO<sub>2</sub> and (d) II-Mo<sub>2</sub>CO<sub>2</sub>. The Fermi level is set to zero.

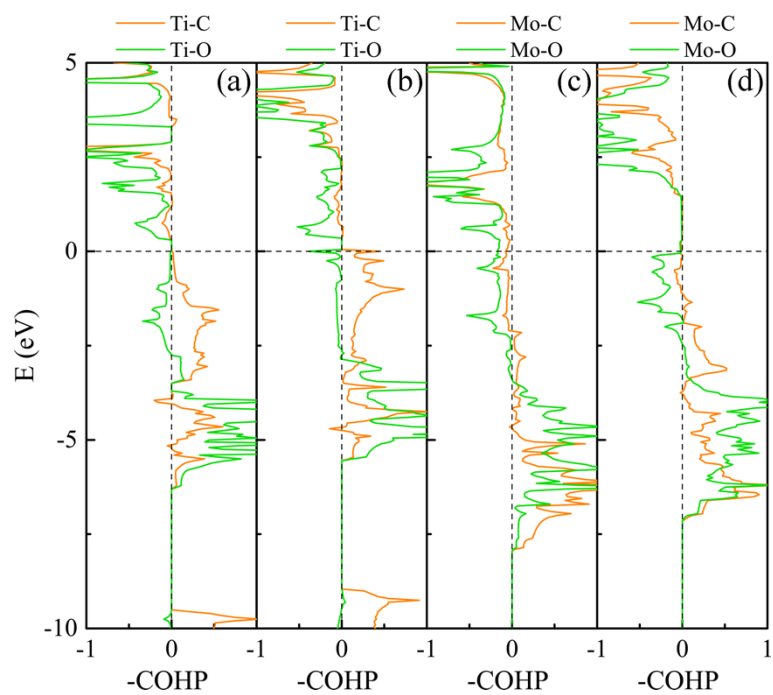

**Fig. S2** The COHP analyses of (a) I- $Ti_2CO_2$ , (b) II- $Ti_2CO_2$ , (c) I- $Mo_2CO_2$  and (d) II- $Mo_2CO_2$ . The Fermi level is set to zero.

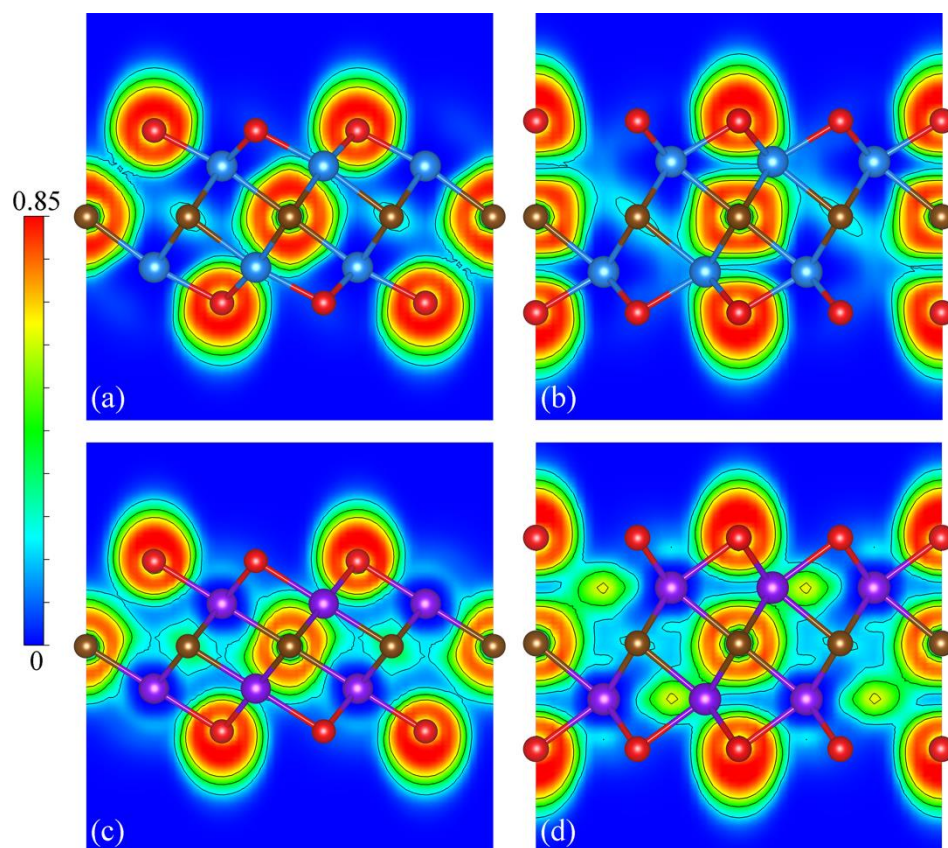

**Fig. S3** The ELF maps of (a) I-Ti<sub>2</sub>CO<sub>2</sub>, (b) II-Ti<sub>2</sub>CO<sub>2</sub>, (c) I-Mo<sub>2</sub>CO<sub>2</sub> and (d) II-Mo<sub>2</sub>CO<sub>2</sub>.

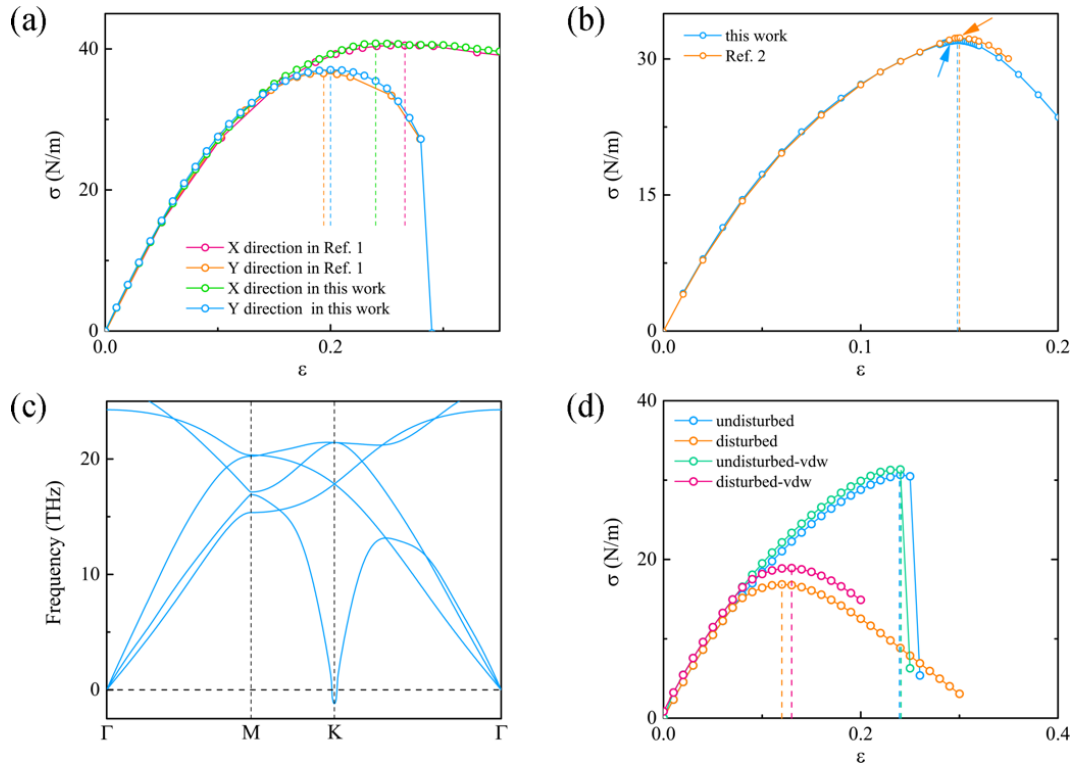

**Fig. S4** (a) The stress-strain curves of graphene under uniaxial tension along  $X$  direction and  $Y$  direction, in excellent agreement with the previous results<sup>8</sup>. (b) The stress-strain curves of graphene under biaxial tension, in agreement with the results of Si et al.<sup>9</sup> (c) the lower phonon dispersion of graphene at  $\epsilon = 14.5\%$ . (d) The comparison of the stress-strain curves of  $\text{Ti}_2\text{CO}_2$  in the original PBE functional and the revised optB86b-vdW functional under uniaxial tension along  $X$  direction.

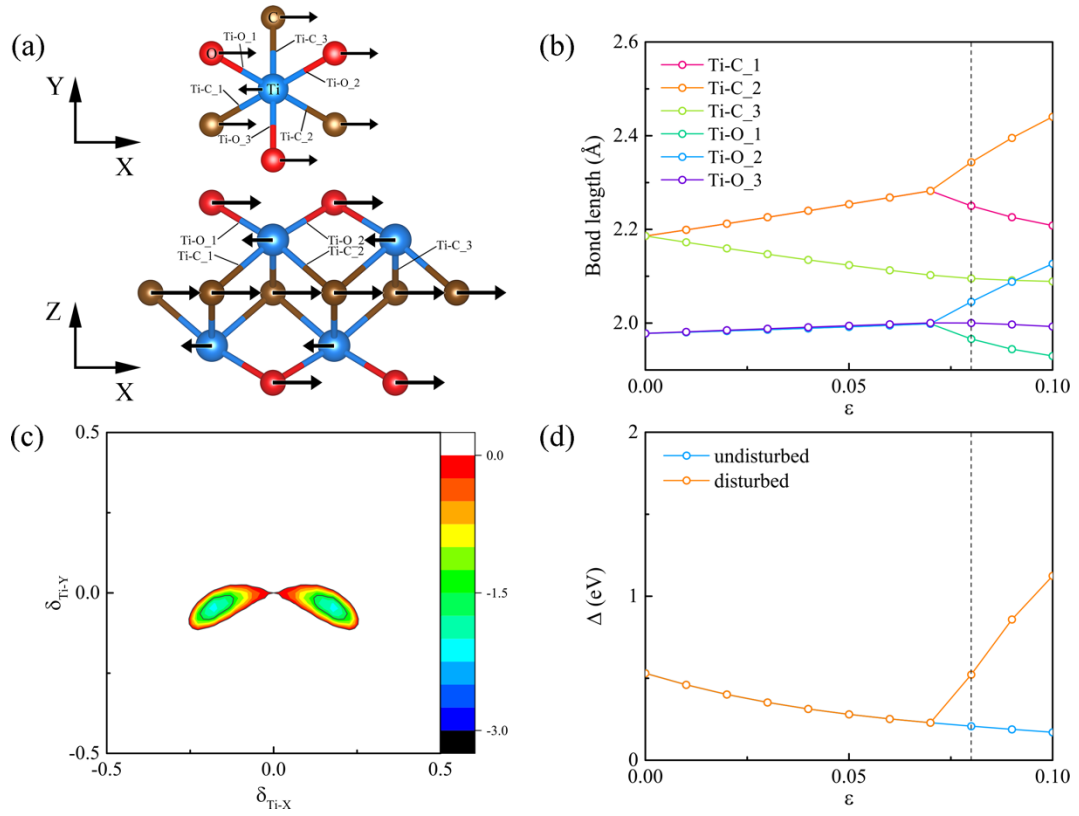

**Fig. S5** (a) The imaginary eigenvector in top view and in side view and (c) the energy vs in-plane movements of a Ti atom at  $\epsilon = 0.15$  under uniaxial tension along  $X$  direction. Note that the unit in the energy map is meV. (b) The bond length vs strain ( $\epsilon$ ) curve and (d) the gap at  $\Gamma$  point ( $\Delta$ ) vs strain ( $\epsilon$ ) curve of  $\text{Ti}_2\text{CO}_2$  under uniaxial tension along  $X$  direction. Note that the dot lines indicate the appearance of phonon instability.

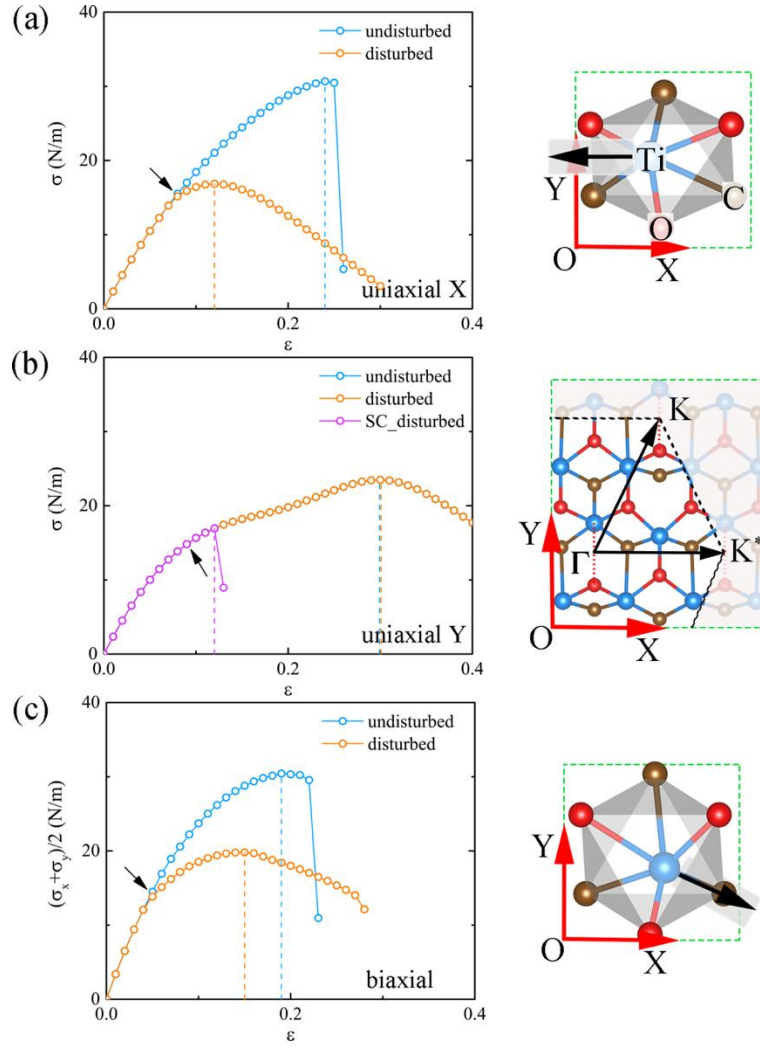

**Fig. S6** The calculated stress-strain curves of  $\text{Ti}_2\text{CO}_2$  under uniaxial tension along (a)  $X$  direction and (b)  $Y$  direction, and (c) under biaxial tension, respectively. Note that the words "undisturbed" and "disturbed" represent that the undisturbed and disturbed methods, respectively. "SC\_disturbed" stands for the calculation performed for a supercell of  $2 \times 2 \times 1$  by the disturbed method. Note that the undisturbed curve and disturbed one are perfectly superimposed in Fig. S6b. The arrows indicate the appearance of dynamic instabilities. The right panels show the deformed polyhedral structure of  $\text{Ti}_2\text{CO}_2$  under the corresponding strain states.

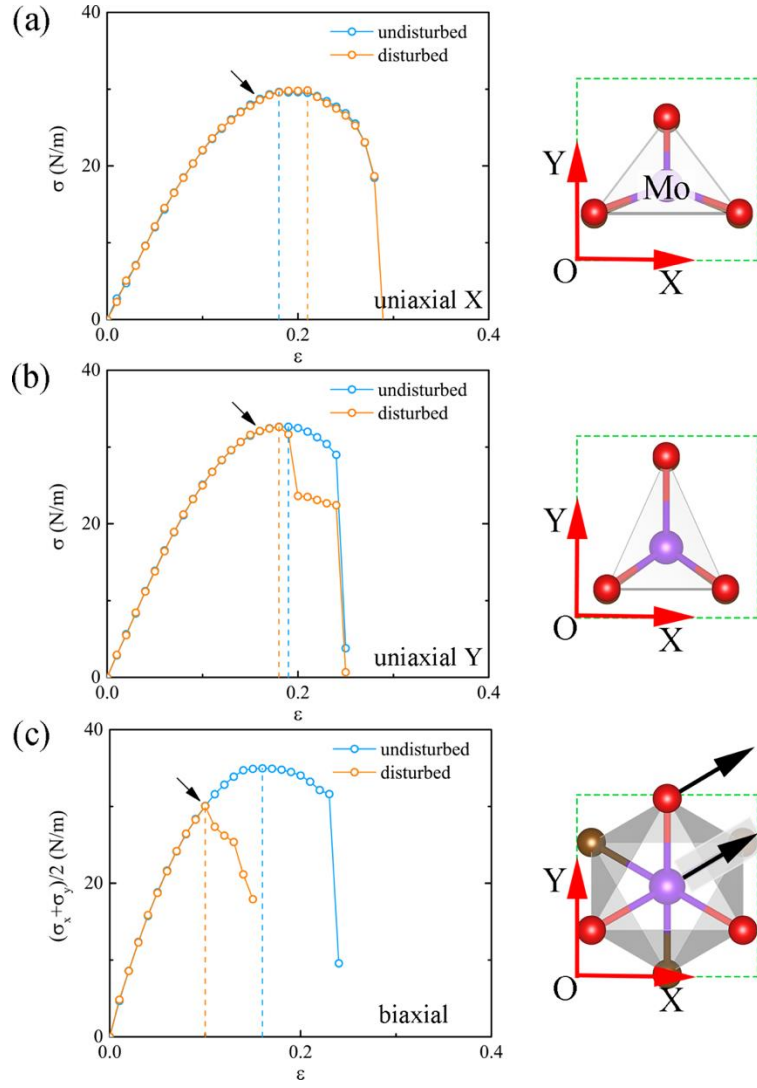

**Fig. S7** The calculated stress-strain curves of  $\text{Mo}_2\text{CO}_2$  under uniaxial tension along (a)  $X$  direction and (b)  $Y$  direction, and (c) under biaxial tension, respectively. Note that the words "undisturbed" and "disturbed" represent that the undisturbed and disturbed methods, respectively. The arrows indicate the appearance of dynamic instabilities. The right panels show the deformed polyhedral structure of  $\text{Mo}_2\text{CO}_2$  under the corresponding strain states.



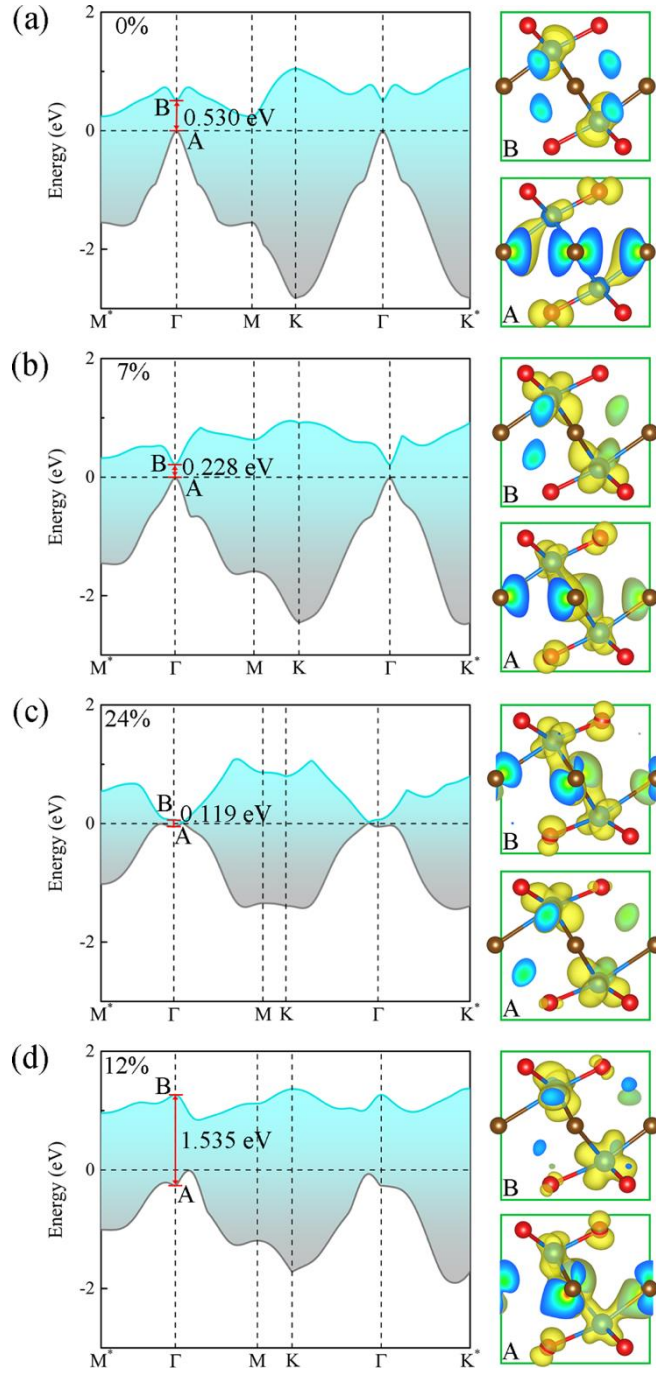

**Fig. S8** The band structure of  $\text{Ti}_2\text{CO}_2$  (a) at equilibrium ( $\varepsilon = 0\%$ ) and at the critical strains (b) near the dynamic instability ( $\varepsilon = 7\%$ ), (c) near the lattice instability by the undisturbed method ( $\varepsilon = 24\%$ ), and (d) near the lattice instability by the disturbed method ( $\varepsilon = 12\%$ ) under uniaxial tension along  $X$  direction. The Fermi level is set to zero. For clarity, only most relevant two bands near the Fermi level are drawn. The right panels show the band composed charge density (BCCD) of the two bands at  $\Gamma$  point projected in  $(110)$  plane. The isosurface maps of the BCCD correspond to 0.01 electrons/Bohr<sup>3</sup>.

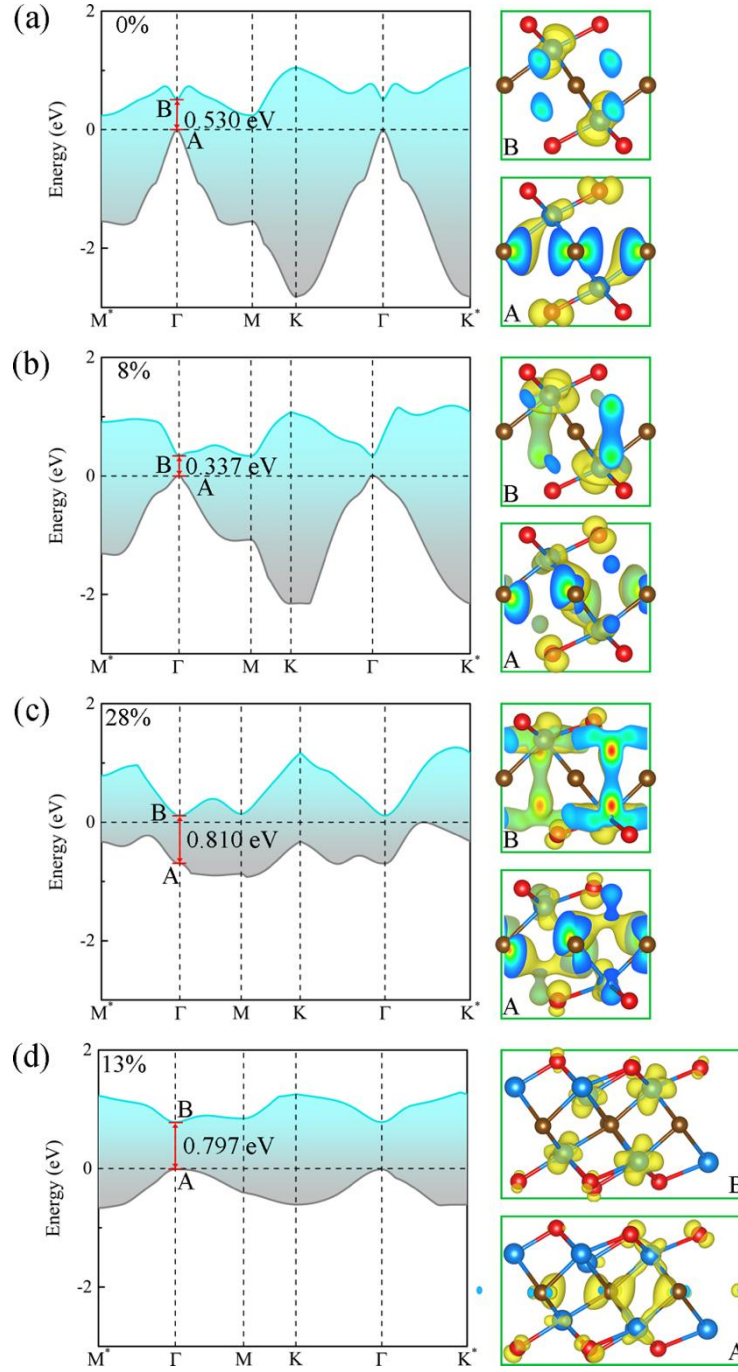

**Fig. S9** The band structure of  $\text{Ti}_2\text{CO}_2$  (a) at equilibrium ( $\varepsilon = 0\%$ ) and at the critical strains (b) near the dynamic instability ( $\varepsilon = 8\%$ ), (c) near the lattice instability by the undisturbed method ( $\varepsilon = 28\%$ ), and (d) near the lattice instability by the disturbed method ( $\varepsilon = 13\%$ ) under uniaxial tension along  $Y$  direction. The Fermi level is set to zero. For clarity, only most relevant two bands near the Fermi level are drawn. The right panels show the band composed charge density (BCCD) of the two bands at  $\Gamma$  point projected in (110) plane. The isosurface maps of the BCCD correspond to 0.01 electrons/Bohr<sup>3</sup>.

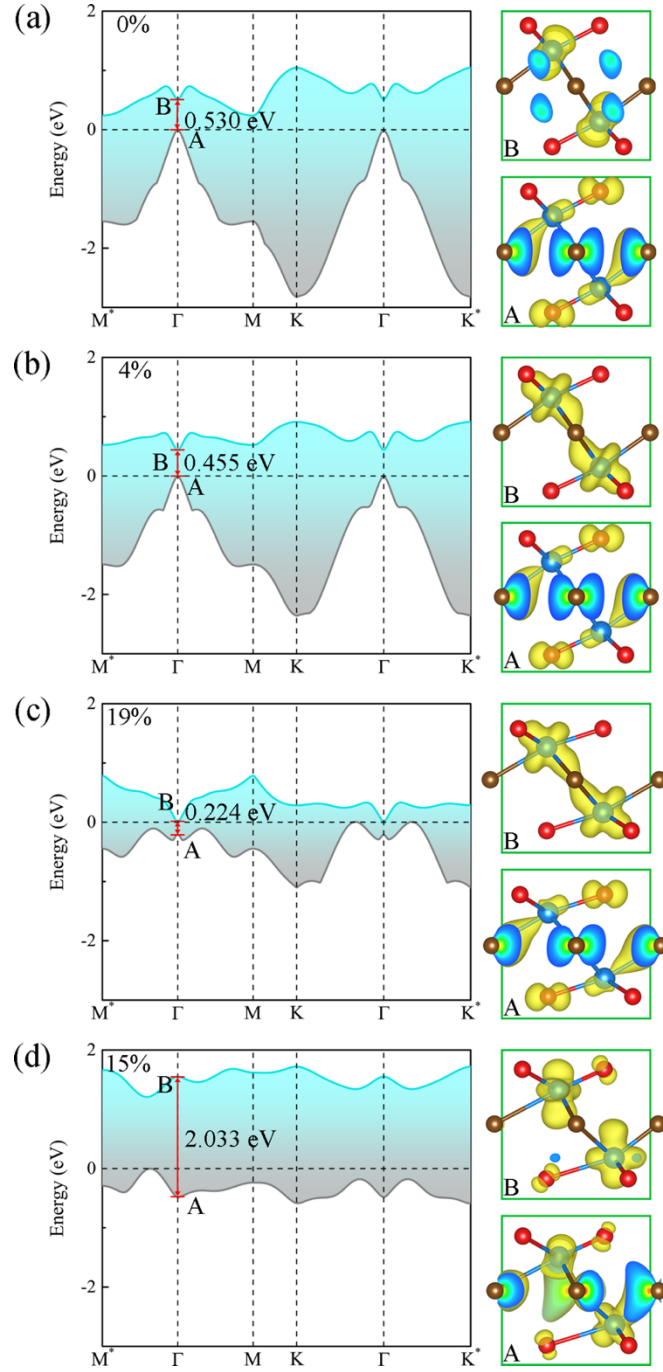

**Fig. S10** The band structure of  $\text{Ti}_2\text{CO}_2$  (a) at equilibrium ( $\epsilon = 0\%$ ) and at the critical strains (b) near the dynamic instability ( $\epsilon = 4\%$ ), (c) near the lattice instability by the undisturbed method ( $\epsilon = 19\%$ ), and (d) near the lattice instability by the disturbed method ( $\epsilon = 15\%$ ) under biaxial tension. The Fermi level is set to zero. For clarity, only most relevant two bands near the Fermi level are drawn. The right panels show the band composed charge density (BCCD) of the two bands at  $\Gamma$  point projected in (110) plane. The isosurface maps of the BCCD correspond to 0.01 electrons/Bohr<sup>3</sup>.

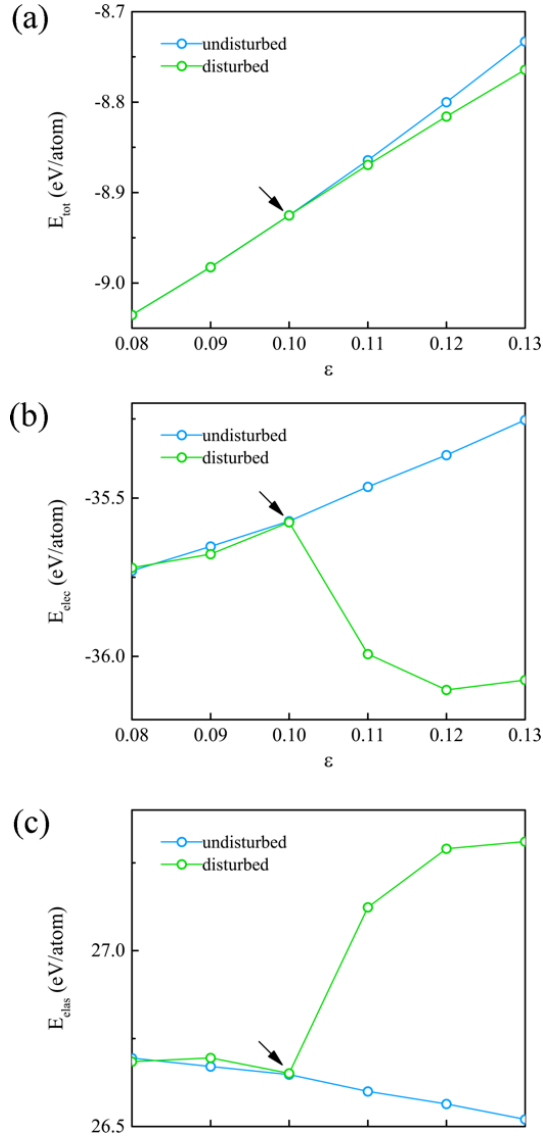

**Fig. S11** (a) The total energy ( $E_{\text{tot}}$ ) vs strain ( $\epsilon$ ) curves, (b) the electronic band energy ( $E_{\text{elec}}$ ) vs strain ( $\epsilon$ ) curves, and (c) the elastic energy ( $E_{\text{elas}}$ ) vs strain ( $\epsilon$ ) curves of metallic  $\text{Mo}_2\text{CO}_2$  in the undisturbed mode and disturbed mode under biaxial tension. The arrows indicate the appearance of dynamic instabilities.

## References

1. M. Khazaei, M. Arai, T. Sasaki, C. Y. Chung, N. S. Venkataramanan, M. Estili, Y. Sakka and Y. Kawazoe, *Adv. Funct. Mater.*, 2013, **23**, 2185-2192.
2. Y. Xie and P. R. C. Kent, *Phys. Rev. B*, 2013, **87**, 235441.
3. X. Zhang, X. Zhao, D. Wu, Y. Jing and Z. Zhou, *Nanoscale*, 2015, **7**, 16020-16025.
4. X.-H. Zha, K. Luo, Q. Li, Q. Huang, J. He, X. Wen and S. Du, *EPL (Europhysics Letters)*, 2015, **111**, 26007.
5. M. Khazaei, M. Arai, T. Sasaki, M. Estili and Y. Sakka, *Phys. Chem. Chem. Phys.*, 2014, **16**, 7841-7849.
6. J.-J. Zhang and S. Dong, *J. Chem. Phys.*, 2017, **146**, 034705.
7. H. Weng, A. Ranjbar, Y. Liang, Z. Song, M. Khazaei, S. Yunoki, M. Arai, Y. Kawazoe, Z. Fang and X. Dai, *Phys. Rev. B*, 2015, **92**, 075436.
8. F. Liu, P. Ming and J. Li, *Phys. Rev. B*, 2007, **76**, 064120.
9. C. Si, W. Duan, Z. Liu and F. Liu, *Phys. Rev. Lett.*, 2012, **109**, 226802.
